# Supplementary material for: Age- and Intravenous Methotrexate-Associated Leukoencephalopathy and Its Neurological Impact in Pediatric Patients with Lymphoblastic Leukemia
Source: MDPI journal article supplement (doi:10.3390/cancers13081939), 2021-04-16
Supplement: s1 [file s1]

# Age- and Intravenous Methotrexate-Associated Leukoencephalopathy and Its Neurological Impact in Pediatric Patients with Lymphoblastic Leukemia

Ilona Rijmenams <sup>1,2,†</sup>, Daan Moechars <sup>1,2,†</sup>, Anne Uyttebroeck <sup>2,3,7</sup>, Ahmed Radwan <sup>4,6,7</sup>, Jeroen Blommaert <sup>5,6,7</sup>, Sabine Deprez <sup>4,6,7</sup>, Stefan Sunaert <sup>4,6,7</sup>, Heidi Segers <sup>2,3,7</sup>, Céline R. Gillebert <sup>1,6</sup>, Jurgen Lemiere <sup>3,6,7</sup> and Charlotte Sleurs <sup>2,6,7\*</sup>

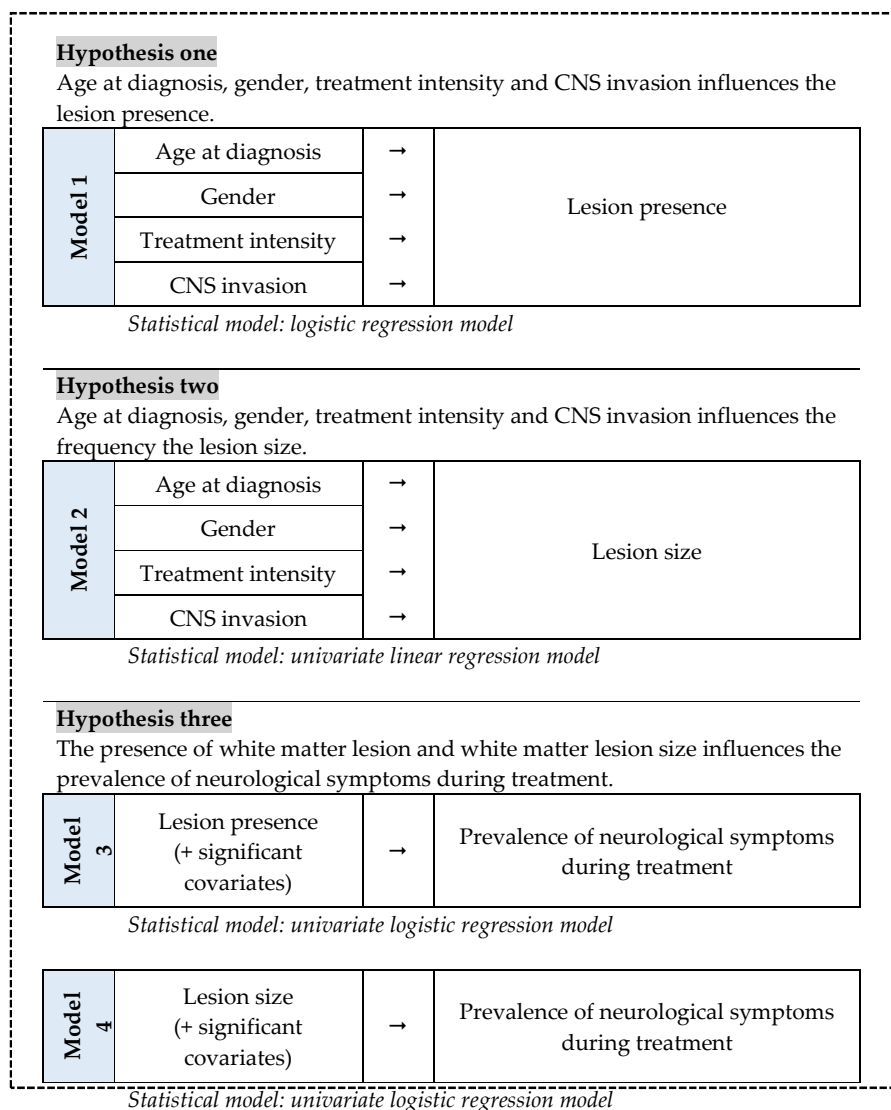

**Figure S1.** Visual overview of hypotheses.

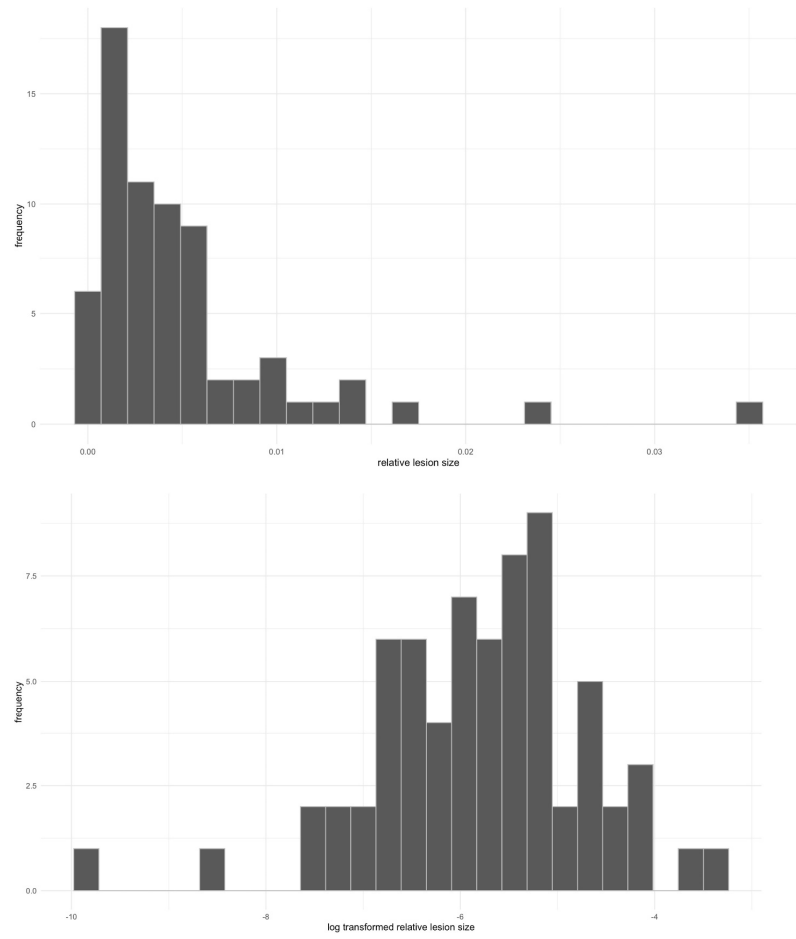

**Figure S2.** Logarithmic transformation of relative lesion sizes

| Cum. IV-<br>MTXdose | Age (years) |       |      |     |      |     |     |     |     |     |     |     |     |     |     |       |
|---------------------|-------------|-------|------|-----|------|-----|-----|-----|-----|-----|-----|-----|-----|-----|-----|-------|
|                     | <2          | 2     | 3    | 4   | 5    | 6   | 7   | 8   | 9   | 10  | 11  | 12  | 13  | 14  | 15  | 18yrs |
| 20g/m <sup>2</sup>  | 1/2         | 10/14 | 8/13 | 7/8 | 5/10 | 2/4 | 1/2 | 1/1 | 1/5 | 1/2 | 0/4 | 1/7 | 0/3 | 0/2 | 2/5 |       |
| 35g/m <sup>2</sup>  | 2/2         | 1/2   | 1/1  | 1/2 |      | 1/1 | 0/1 |     | 0/1 | 0/1 |     |     |     |     | 0/1 |       |
| 50g/m <sup>2</sup>  | 0/1         | 1/1   |      | 3/3 | 1/1  | 2/2 | 1/1 | 0/1 | 1/3 | 1/2 | 1/2 |     |     |     | 1/1 |       |
| 55 g/m <sup>2</sup> | 2/4         |       | 3/3  | 1/1 | 1/1  |     |     |     | 0/1 | 1/1 |     |     | 1/3 |     |     | 1/1   |

**Figure S3.** Heatmap of lesion occurrence by age at diagnosis and cumulative IV-MTX dose. Note. Age is categorized by each year (e.g. 2years represents the age category of 2-3years old). For each cell, the relative percentage of patients showing a lesion is presented (e.g. out of 2 patients of <2years old receiving 20g/m<sup>2</sup>, 1 patient had a lesion). Cumulative MTX doses are presented, depending on the treatment protocol and the patient's risk group (with each separate administration of 5g/m<sup>2</sup>). Low percentages are presented in green, higher percentages in orange and red. Both age and IV-MTX dose appear associated with the risk of developing lesions.

| Cum. IV-<br>MTXdose | Age (years) |      |      |     |      |     |     |     |     |     |     |     |     |     |     |       |
|---------------------|-------------|------|------|-----|------|-----|-----|-----|-----|-----|-----|-----|-----|-----|-----|-------|
|                     | <2          | 2    | 3    | 4   | 5    | 6   | 7   | 8   | 9   | 10  | 11  | 12  | 13  | 14  | 15  | 18yrs |
| 20g/m <sup>2</sup>  | 0/2         | 1/14 | 1/13 | 1/8 | 0/10 | 1/4 | 1/2 | 0/1 | 0/5 | 0/2 | 0/4 | 1/7 | 0/3 | 0/2 | 1/5 |       |
| 35g/m <sup>2</sup>  | 1/2         | 0/2  | 0/1  | 0/2 |      | 0/1 | 0/1 |     | 0/1 | 0/1 |     |     |     |     | 0/1 |       |
| 50g/m <sup>2</sup>  | 0/1         | 0/1  |      | 0/3 | 0/1  | 0/2 | 1/1 | 0/1 | 1/3 | 1/2 | 1/2 |     |     |     | 0/1 |       |
| 55g/m <sup>2</sup>  | 0/4         |      | 1/3  | 0/1 | 1/1  |     |     |     | 0/1 | 0/1 |     |     | 1/3 |     |     | 0/1   |

**Figure S4.** Heatmap of neurological symptoms by age at diagnosis and cumulative IV-MTX dose. Note. Age is categorized by each year (e.g. 2years represents the age category of 2-3years old). For each cell, the relative percentage of patients showing a neurological symptom is presented (e.g. out of 2 patients of <2years old receiving 35g/m<sup>2</sup>, 1 patient had a neurological symptom). Cumulative MTX doses are presented, depending on the treatment protocol and the patient's risk group (with each separate administration of 5g/m<sup>2</sup>). Low percentages are presented in green, higher percentages in orange and red. Across ages, IV-MTX dose is associated with the risk of developing neurological symptoms.

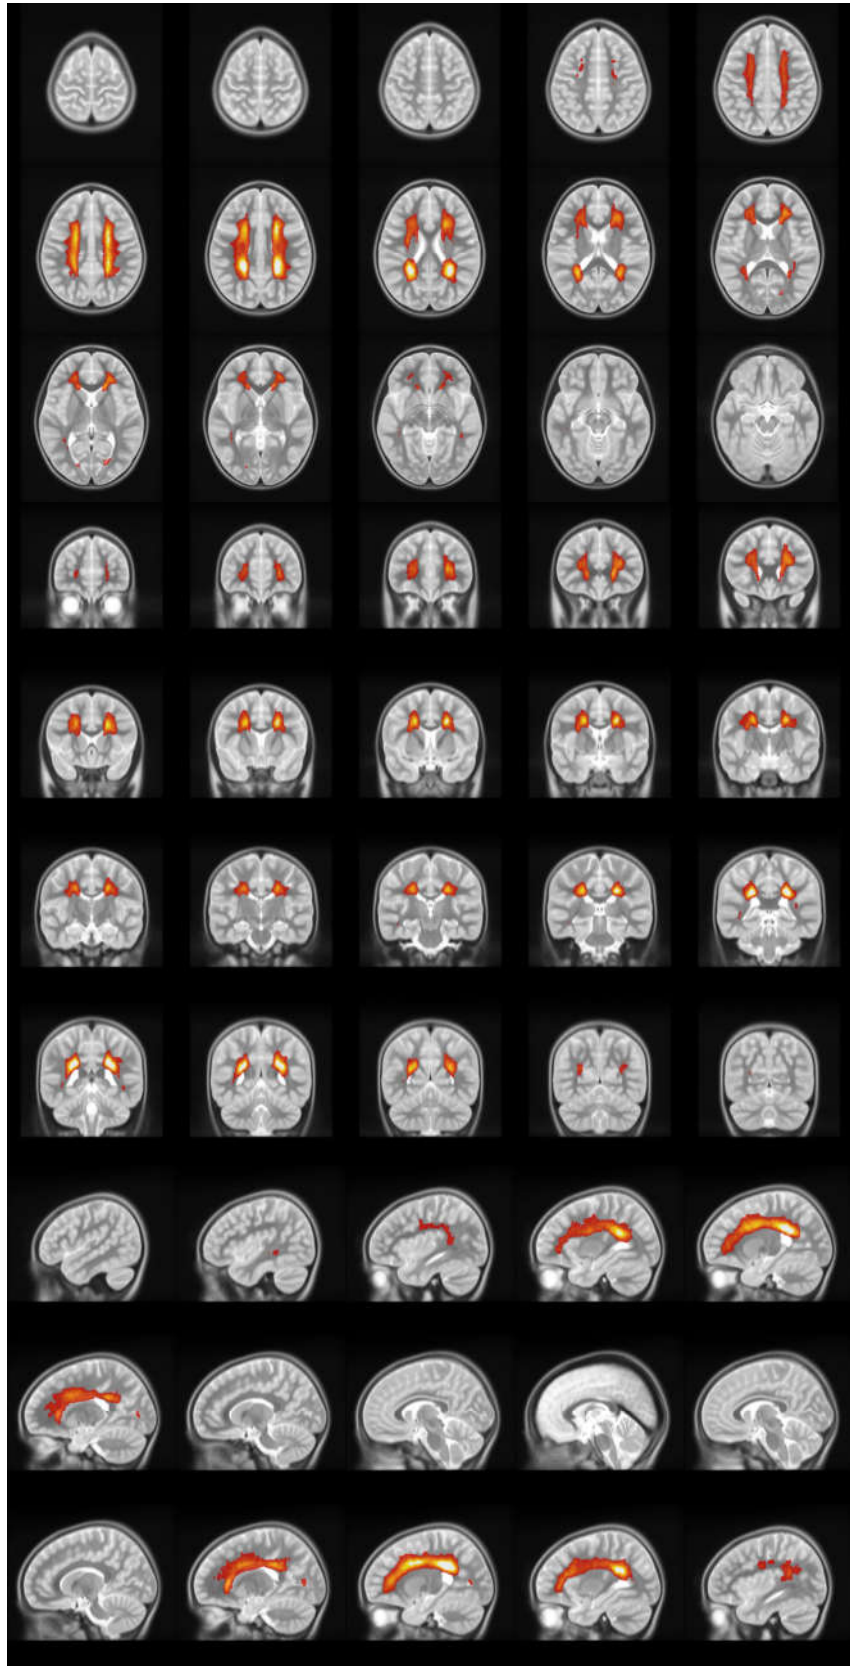

**Figure S5.** Heatmap of white matter lesions at group level mapped on a pediatric atlas. Note. Based on individual binary lesion maps that were nonlinearly co-registered to a pediatric template

(Fonov et al. 2011), one average lesion map across subjects in this pediatric template space was calculated and depicted.

**Table S1.** Number of intravenous and intrathecal methotrexate applications in each risk group and EORTC-CLG protocol

|                                            |        | EORTC<br>58081 | EORTC<br>58951 | EORTC<br>58081 | EORTC<br>58951 | EORTC<br>58081 | EORTC<br>58951 | EORTC<br>58081 | EORTC<br>58951 |
|--------------------------------------------|--------|----------------|----------------|----------------|----------------|----------------|----------------|----------------|----------------|
|                                            |        | VLR            | VLR            | AR1            | AR1            | AR2<br>B/T     | AR2            | VHR            | VHR            |
| Prephase                                   | IV-MTX |                |                |                |                |                |                |                |                |
|                                            | IT-MTX | 1              | 1              | 1              | 1              | 1/1            | 1              | 1              | 1              |
| Induction (IA)                             | IV-MTX |                |                |                |                | 1/0            | 1              |                | 1              |
|                                            | IT-MTX | 2              | 2              | 2*             | 2*             | 2/2*           | 2*             | 2*             | 2*             |
| Consolidation<br>(IB,<br>IB'+VANDA)        | IV-MTX |                |                |                |                |                |                | 1              | 2              |
|                                            | IT-MTX | 2              | 2              | 2*             | 2*             | 2/2*           | 2*             | 4*             | 3*             |
| Interval                                   | IV-MTX | 4              | 4              | 4              | 4              | 4/4*           | 4              | 6              | 3              |
|                                            | IT-MTX | 4              | 4*             | 4*             | 4*             | 4/4*           | 4*             | 6*             | 3*             |
| Intensification<br>(IIA + IIB, R1-<br>3x2) | IV-MTX |                |                |                |                |                |                |                | 4              |
|                                            | IT-MTX | 2              | 1              | 2*             | 1*             | 4/2*           | 1*             | 4*             | 6*             |
| Maintenance                                | IV-MTX |                |                |                |                | 6/6            | 6              |                |                |
|                                            | IT-MTX |                |                | 6*             | 6*             | 6/6*           | 6*             |                | 5*             |
| Total                                      | IV-MTX | 4              | 4              | 4              | 4              | 11/10          | 11             | 7              | 10             |
|                                            | IT-MTX | 11             | 10             | 17             | 16             | 19/17          | 16             | 17             | 20             |

Note. \* indicates triple chemotherapy (i.e. IT-MTX was administered with ARA-C and hydrocortisone).

IT-MTX=intrathecal methotrexate. IV-MTX=intravenous methotrexate. IT-MTX dose per application = 6mg (patient <1year old), 8mg (>1<2 years), 10mg (>2<3 years) 12mg (>3 years). IV-MTX dose per application = 5g/m<sup>2</sup>.

**Table S2.** Characteristics of patients showing neurological symptoms during therapy

|     | Age at<br>dx | Gender | Diagnosi<br>s | Risk<br>group | Protocol       | CNS<br>invasio<br>n | Neurological<br>symptoms | Lesion size<br>(mm <sup>3</sup> ) |
|-----|--------------|--------|---------------|---------------|----------------|---------------------|--------------------------|-----------------------------------|
| 01. | 7.068        | Female | B-ALL         | AR1           | EORTC<br>58951 | No                  | Epilepsy                 | 0                                 |
| 02. | 15.496       | Female | B-ALL         | VLR           | EORTC<br>58951 | No                  | Paresis & TIA            | 933.4996                          |
| 03. | 5.655        | Female | B-ALL         | AR2           | EORTC<br>58951 | No                  | Epilepsy                 | 47712.77                          |
| 04. | 11.962       | Female | T-ALL         | AR2           | EORTC<br>58081 | No                  | Syncopes                 | 32320.25                          |
| 05. | 2.781        | Male   | B-ALL         | AR1           | EORTC<br>58951 | No                  | Epilepsy                 | 2140.065                          |
| 06. | 3.866        | Female | B-ALL         | AR2           | EORTC<br>58951 | Yes                 | Paresis & TIA            | 4881.881                          |

|     |        |        |       |     |                |     |          |          |
|-----|--------|--------|-------|-----|----------------|-----|----------|----------|
| 07. | 10.973 | Female | B-ALL | VHR | EORTC<br>58951 | No  | Epilepsy | 1717.378 |
| 08. | 3.367  | Female | B-ALL | AR1 | EORTC<br>58951 | No  | Epilepsy | 0        |
| 09. | 12.622 | Female | B-ALL | AR1 | EORTC<br>58951 | No  | Paresis  | 0        |
| 10. | 13.499 | Male   | T-ALL | AR2 | EORTC<br>58951 | Yes | Epilepsy | 5499.392 |
| 11. | 1.274  | Male   | B-ALL | VHR | EORTC<br>58081 | No  | TIA      | 7186.134 |
| 12. | 7.534  | Female | B-ALL | VHR | EORTC<br>58951 | No  | Epilepsy | 2465.969 |
| 13. | 9.244  | Male   | T-ALL | AR2 | EORTC<br>58081 | No  | Epilepsy | 0        |

**Table S3.** Logistic regression analyses of effect of intravenous MTX and lesion presence/size on neurological symptoms

| Variable        | $\beta_1$<br>coefficient | SE   | P Value | Odds-<br>ratio | Chi-square, p<br>(model) |
|-----------------|--------------------------|------|---------|----------------|--------------------------|
| Intravenous MTX | .201                     | .097 | .038    | 1.223          | $\chi^2=5.915, p=.052$   |
| Lesion presence | .602                     | .644 | .350    | 1.825          |                          |
| Intravenous MTX | .297                     | .131 | .024    | 1.346          | $\chi^2=6.032, p=.049$   |
| Lesion size     | -.037                    | .846 | .965    | .964           |                          |
